# Supplementary material
Source: PubMed Central journal article supplement (PMC3252821)

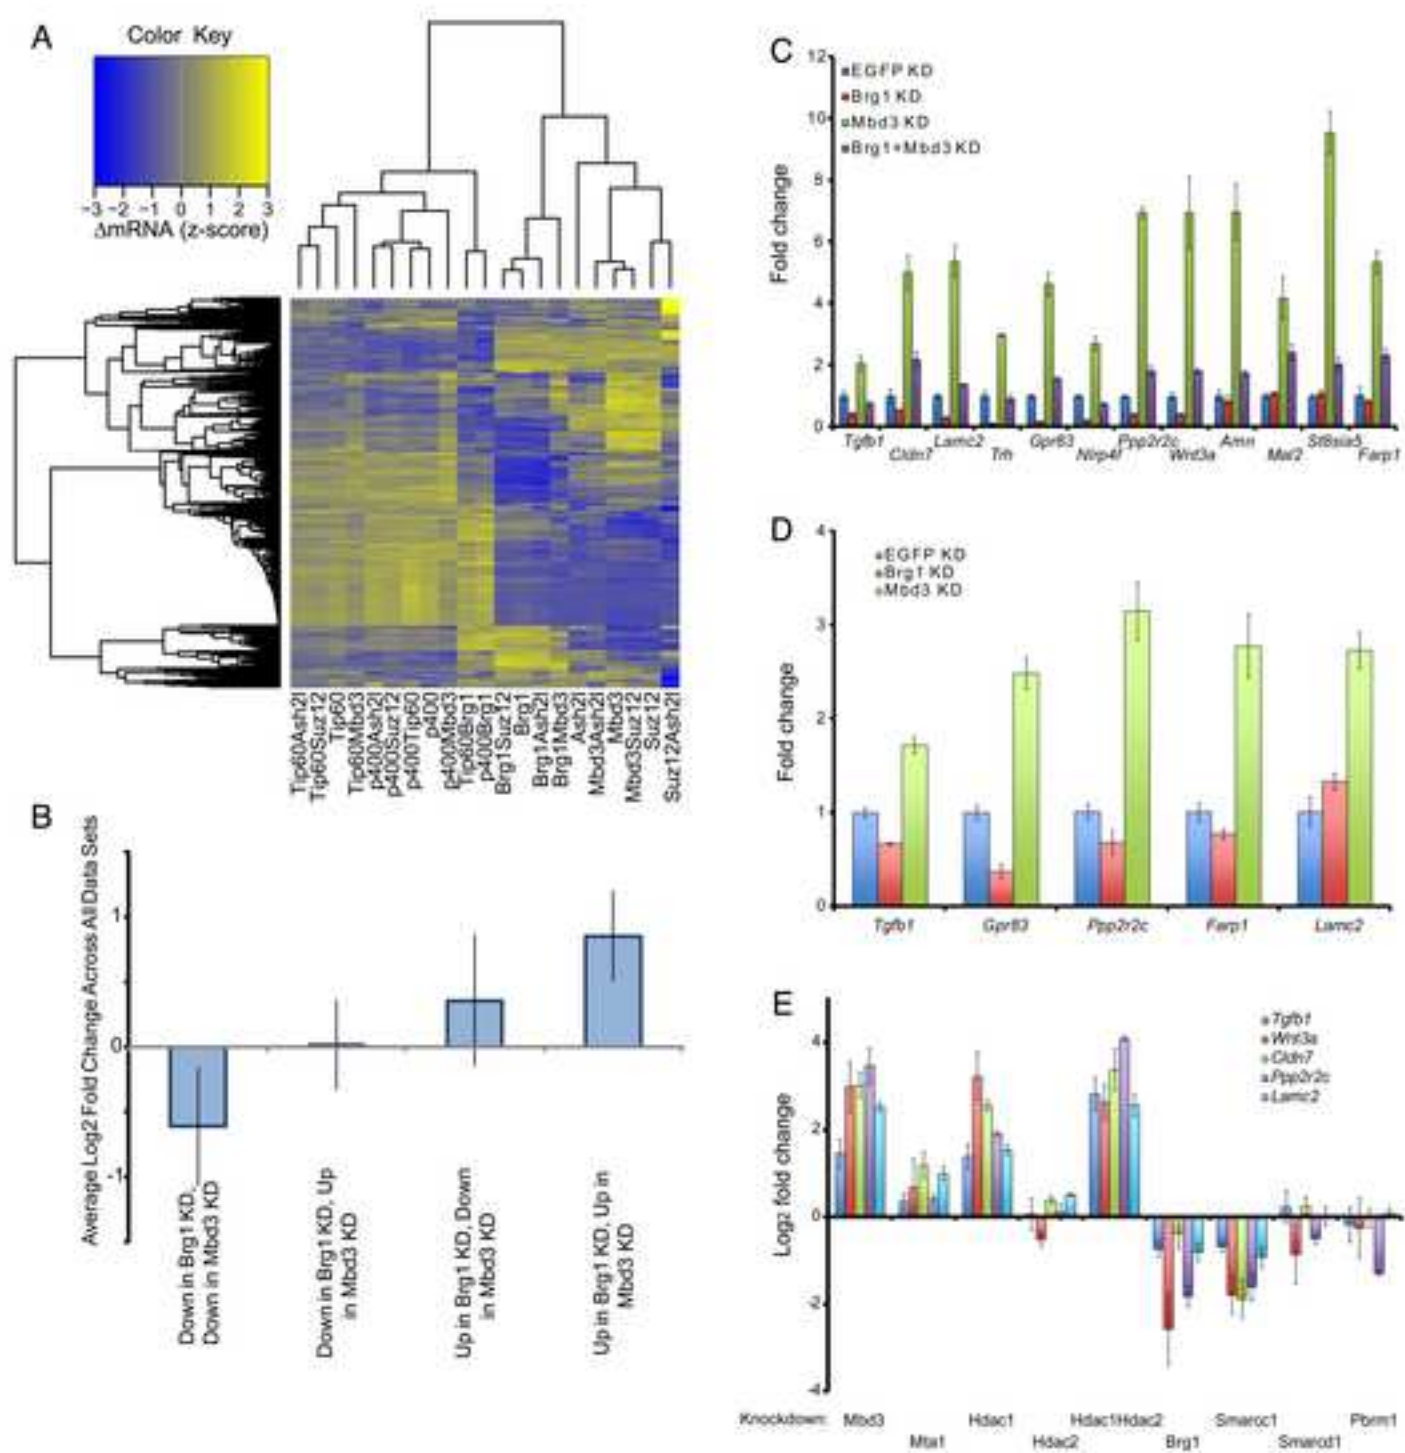

### Mbd3 localization

Abcam antibody

Bethyl antibody

TSS

TSS

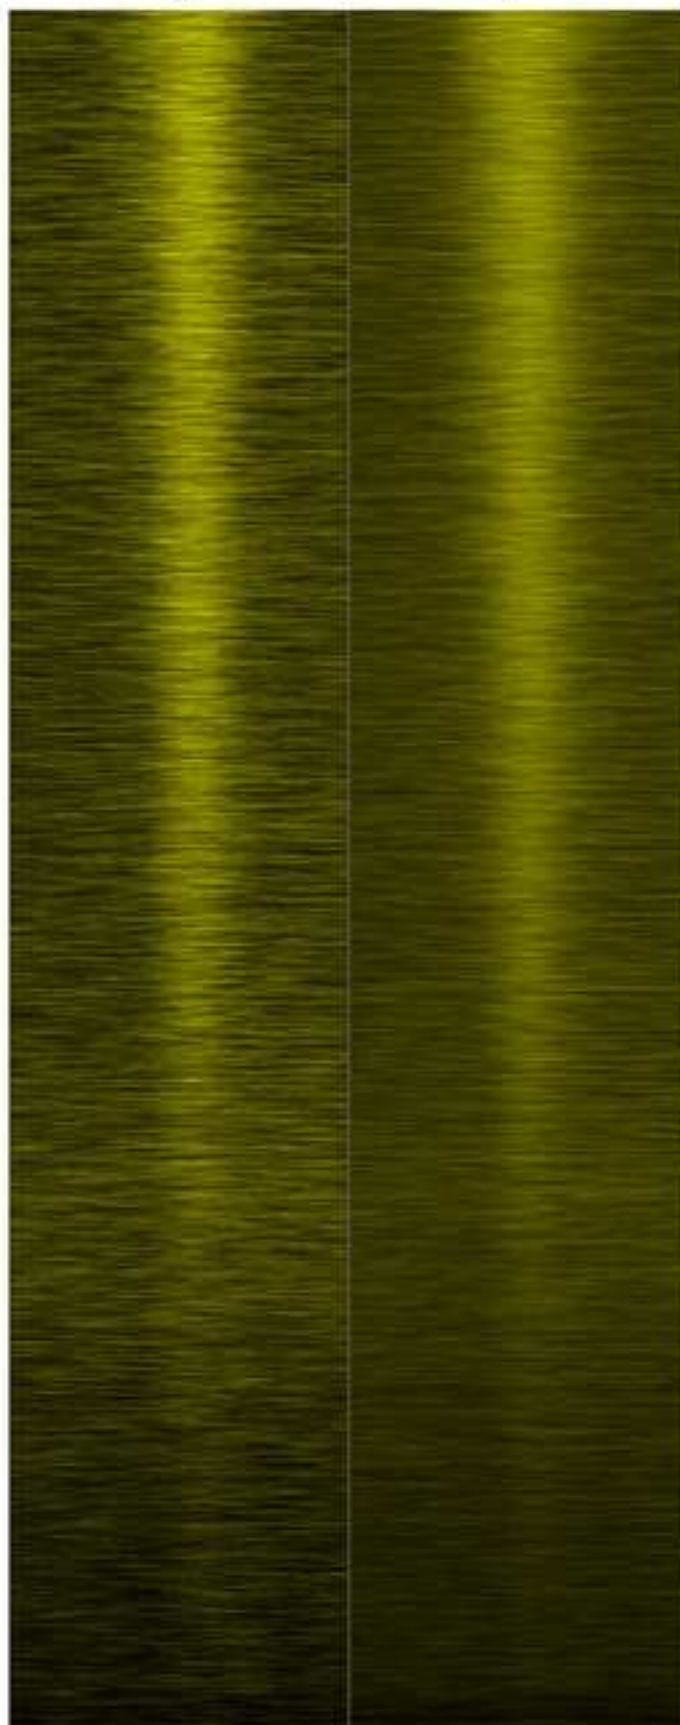

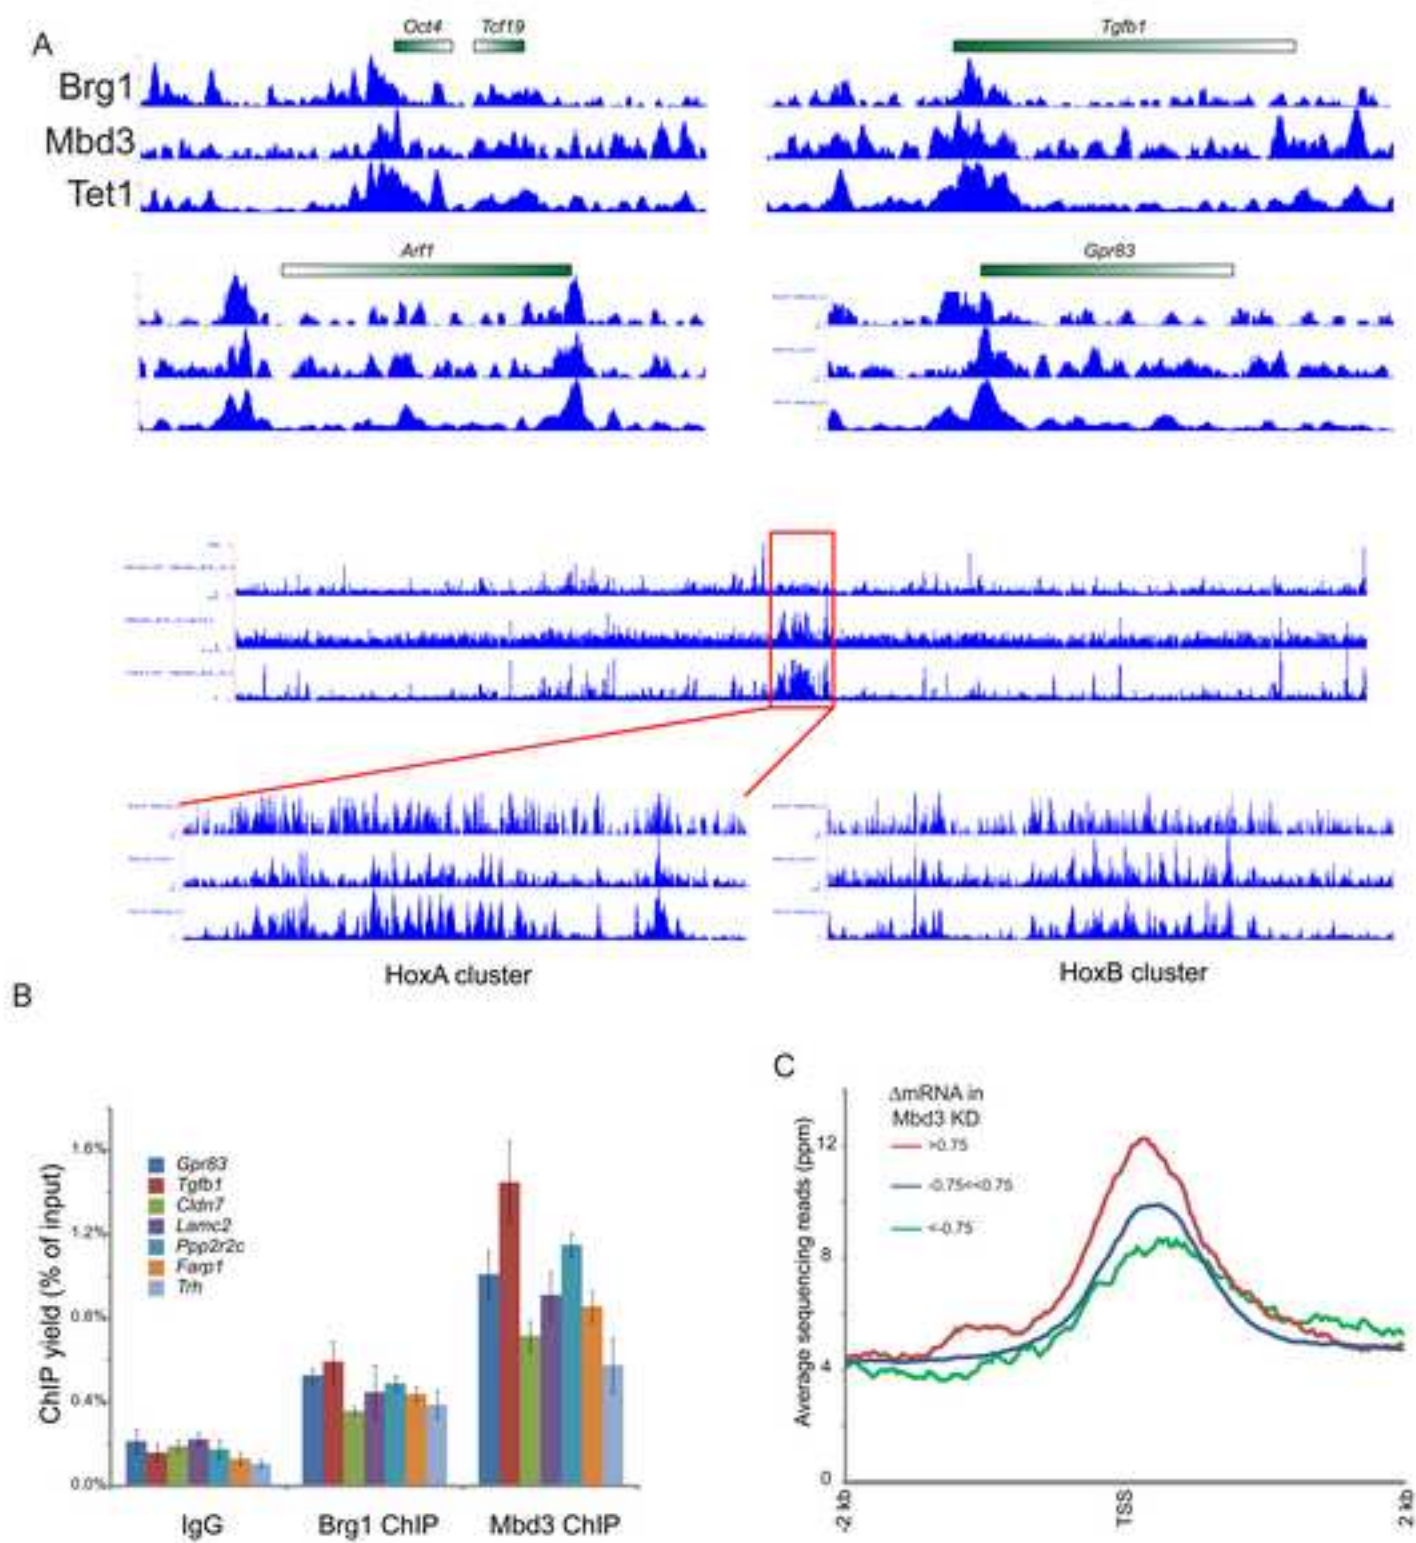



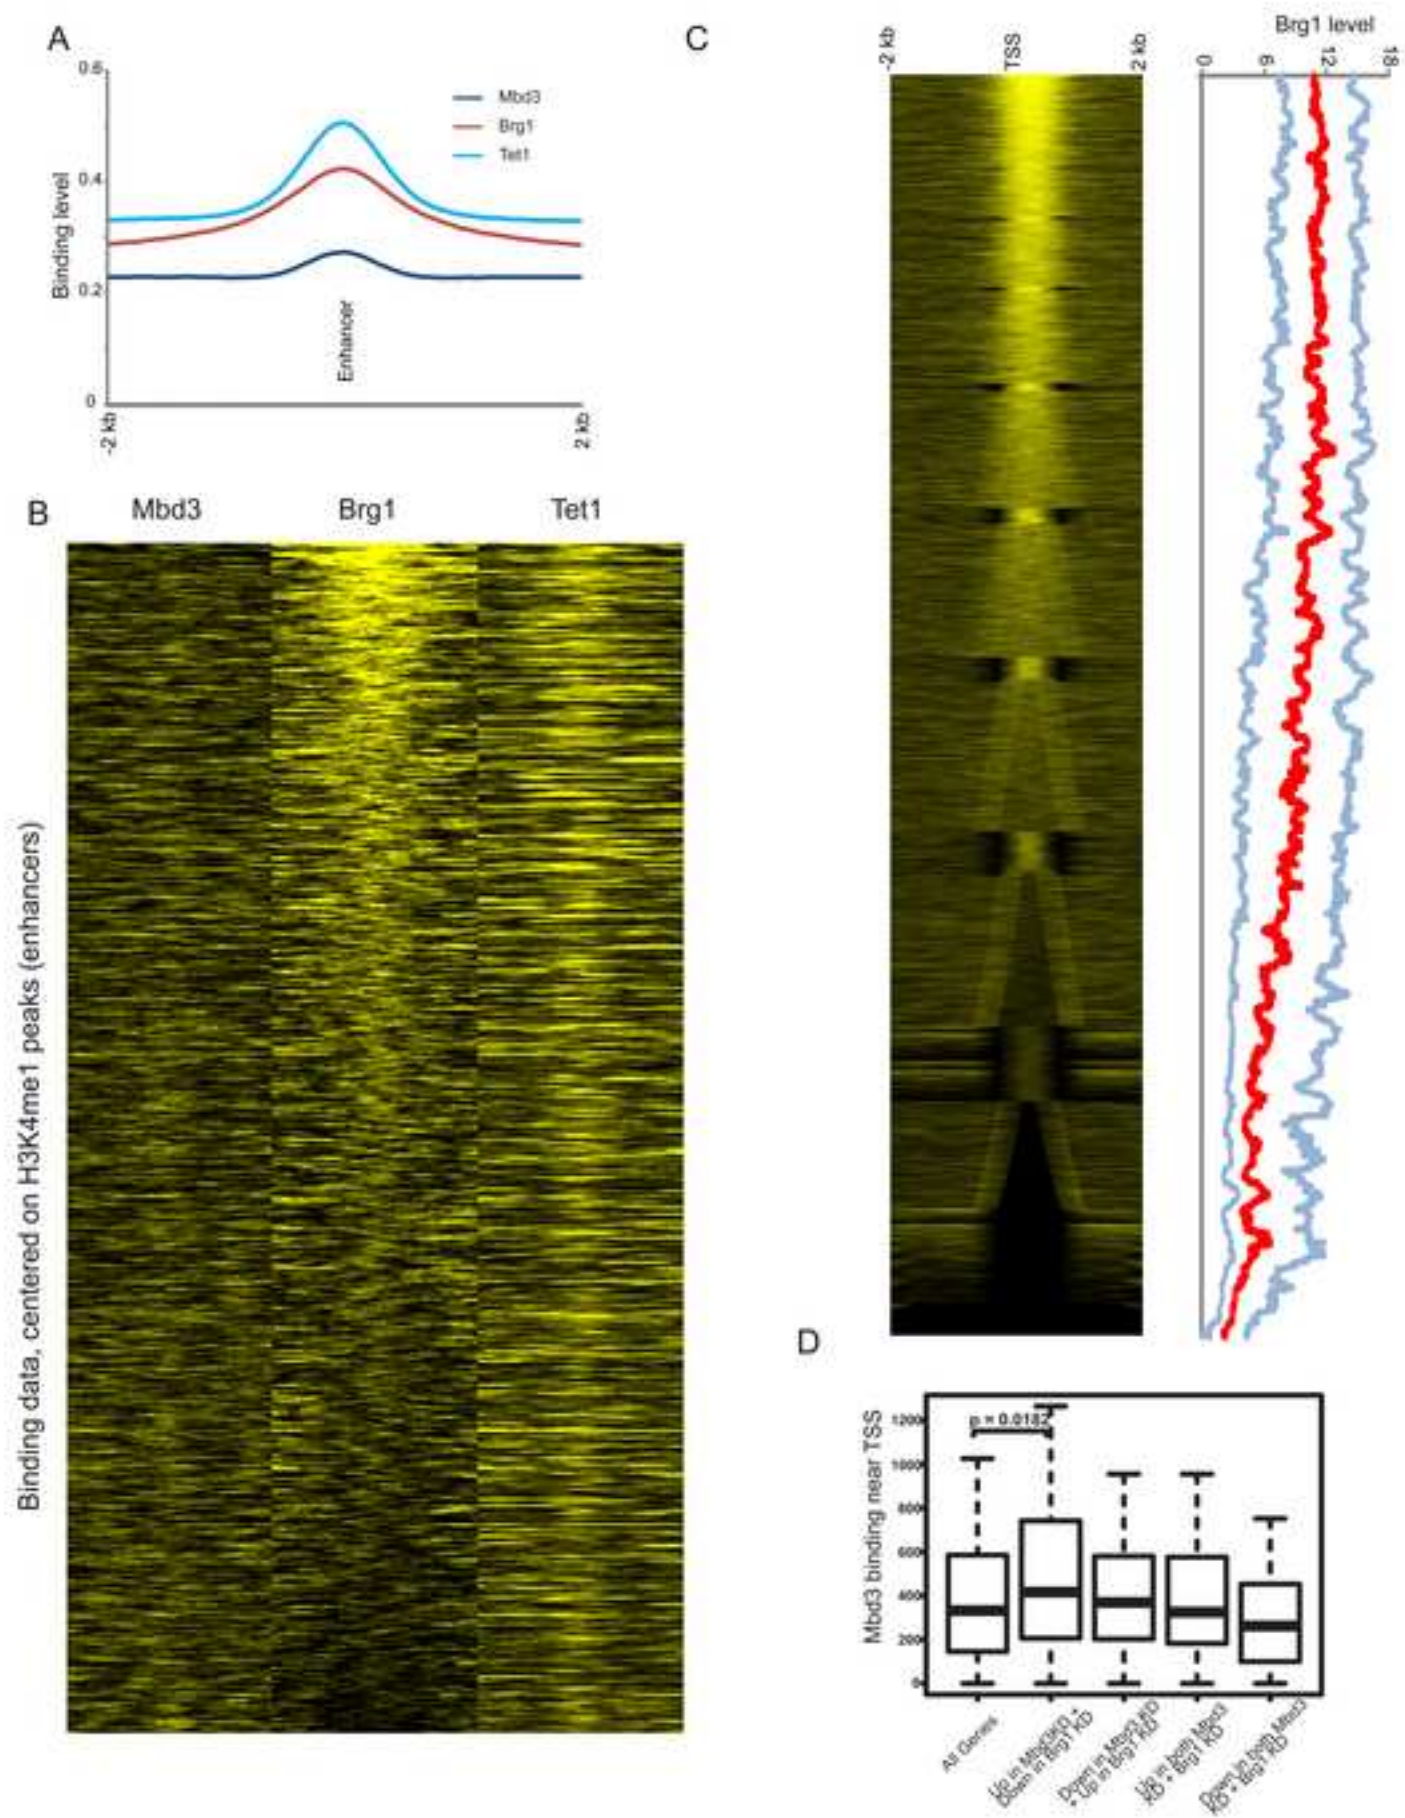

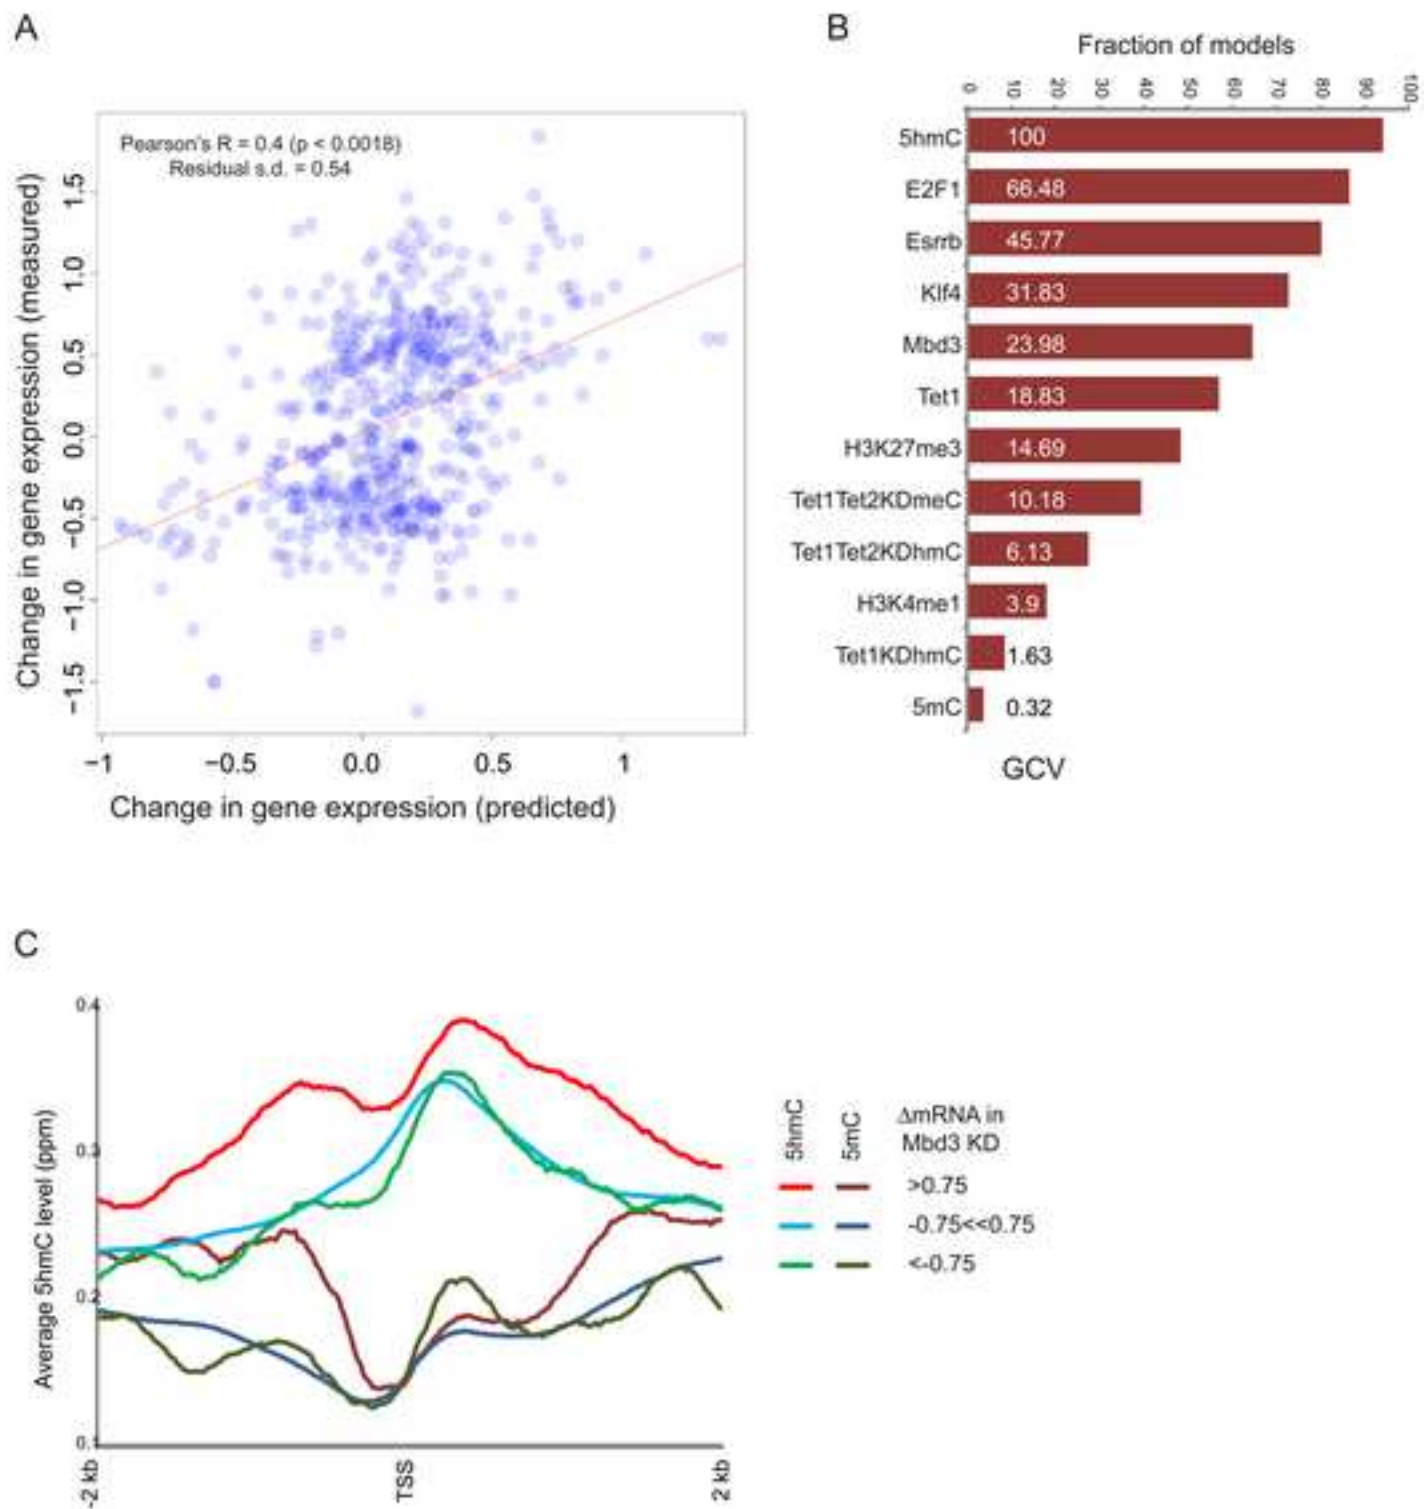

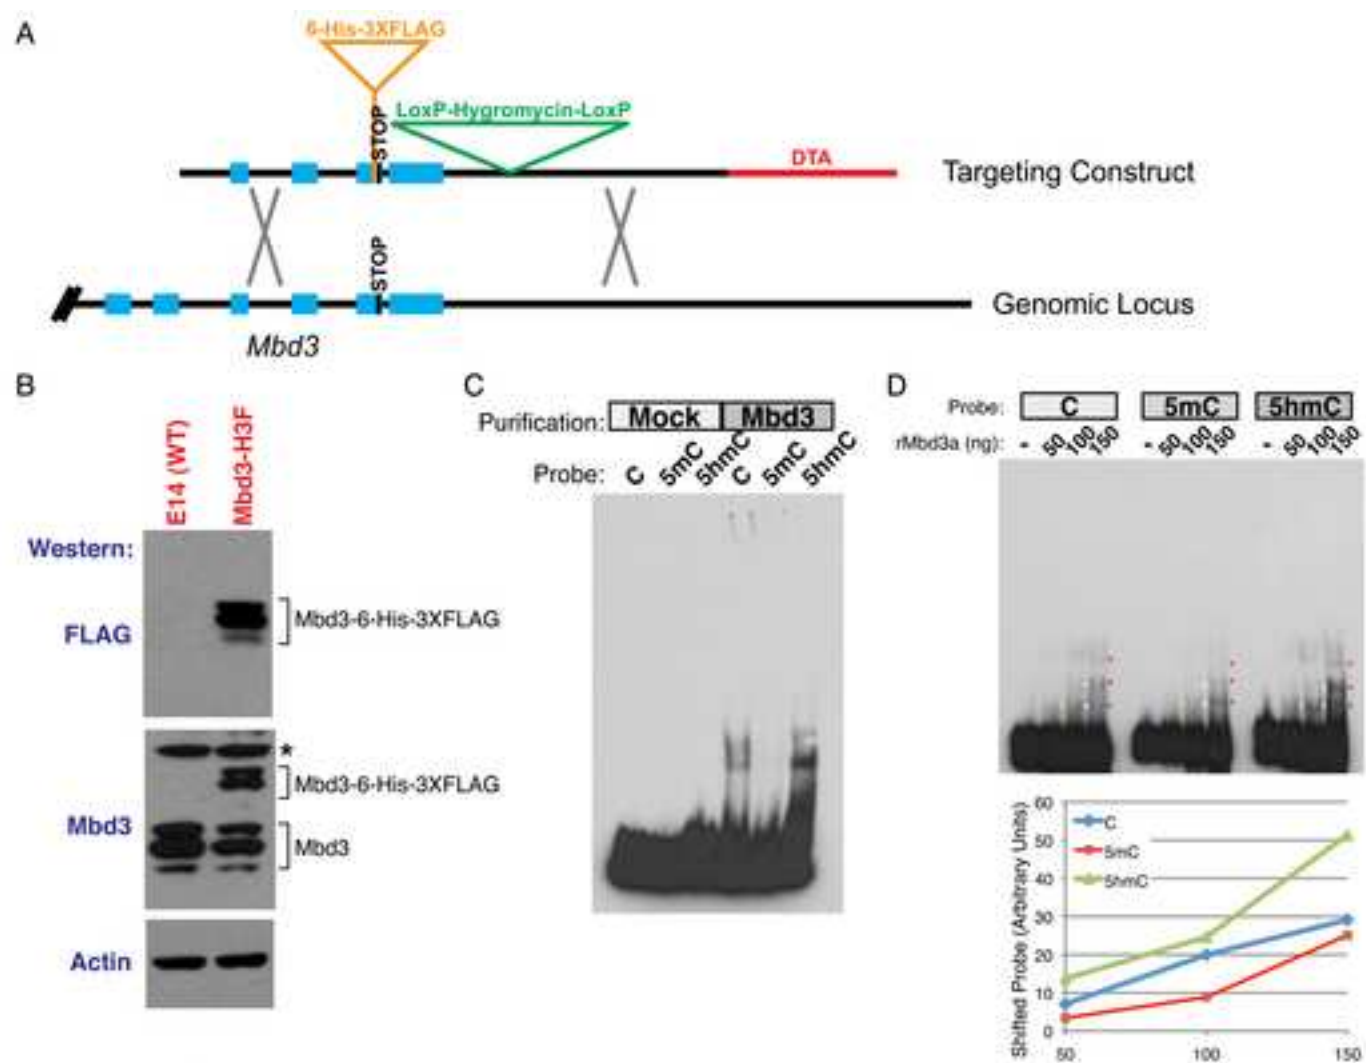

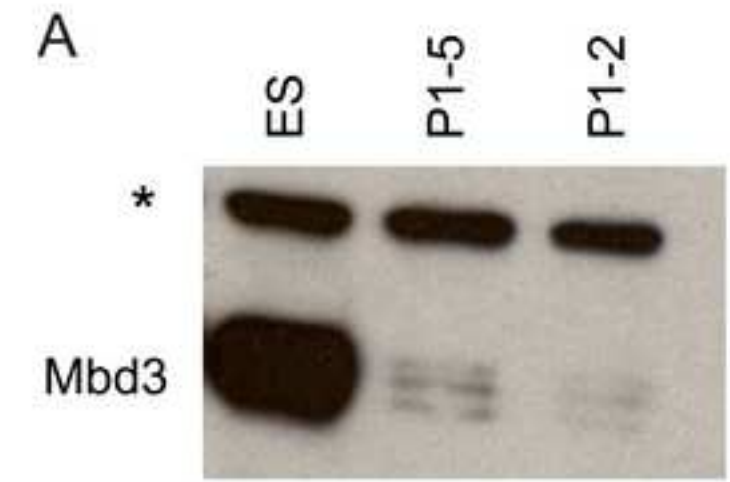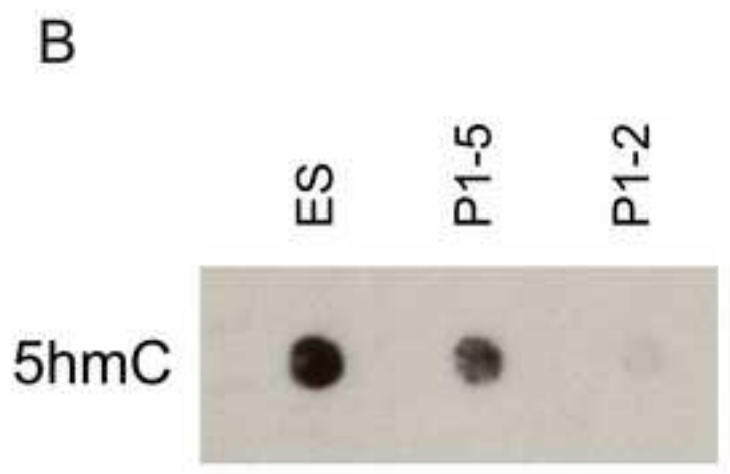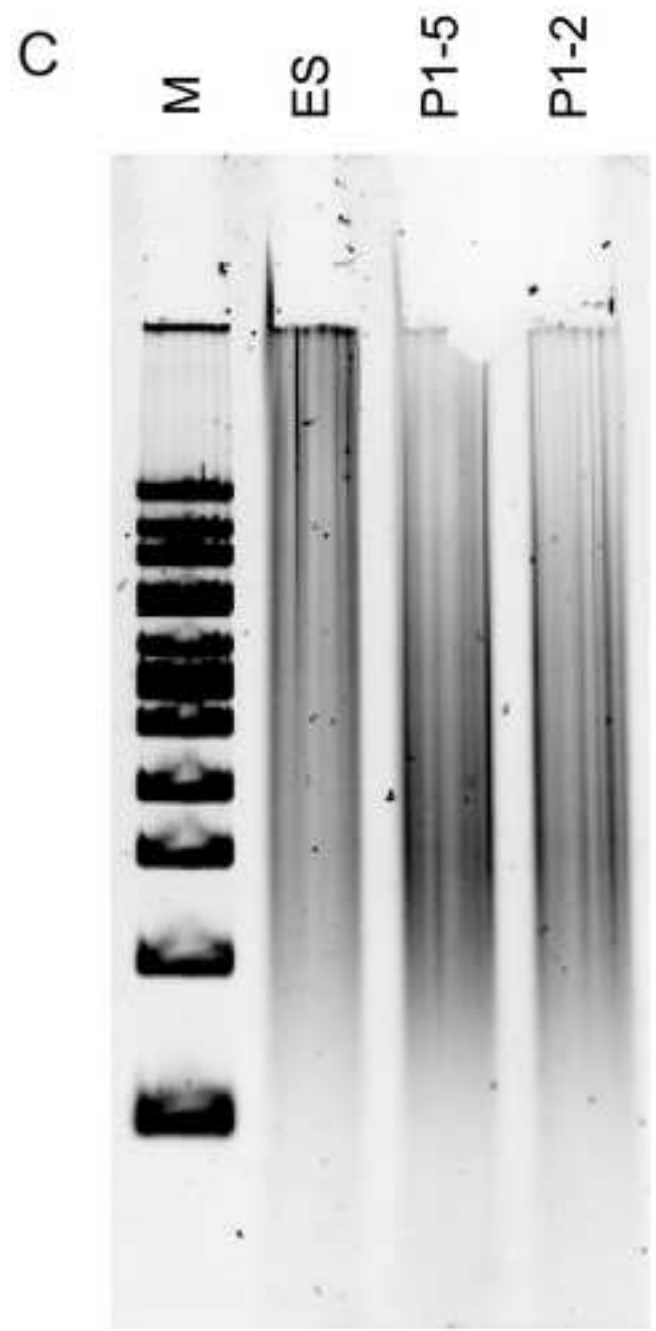

Supplement: NIHMS343144-supplement-02.pdf [file NIHMS343144-supplement-02.pdf]
